# Supplementary material
Source: PubMed Central journal article supplement (PMC3104849)

# **Smac Mimetics Increase Cancer Cell Response to Chemotherapeutics in a TNF- $\alpha$ Dependent Manner**

Brandon L. Probst, Liping Liu, Vijayashree Ramesh, Lin Li, Haizhou Sun, John D. Minna, and Lai Wang

## **Supplementary Figure Legends**

Supplementary Figure 1. JP1400/Chemotherapy agent combination effect in A2058 cells. A2058 cells were plated in 96 well plates for 16-24 h prior to the treatment of increasing concentration of gemcitabine, paclitaxel, 5-FU, cisplatin, etoposide, or SN38 in the presence or absence of 100 nM JP1400. After another 72 h, cells viability was determined by measuring ATP levels. Data are presented as mean  $\pm$  standard deviation of triplicates. Experiments were repeated three times with similar results.

Supplementary Figure 2. JP1400/Chemotherapy agent combination effect on cell proliferation. A2058 cells were treated with chemotherapy agents at the indicated concentration for 24 h in the presence or absence of 20  $\mu$ M z-VAD. Cells were then labeled with BrdU as described in the Materials and Methods. Cell proliferation rate was normalized with that of control samples. Data are presented as mean + standard deviation of triplicates. Experiments were repeated three times with similar results.

Supplementary Figure 3. JP1400/Chemotherapy agent combination effect on caspase-3 activation. A2058 cells (A) or HT-29 cells (B and C) were treated with JP1400 and/or chemodrugs at the indicated concentration. Cell lysates were collected after 4 h or 24 h. Caspase-3 and Actin levels were determined by western-blot analysis. Results are representative of two independent experiments.

Supplementary Figure 4. JP1400/Chemodrugs mimetic synergism acts through autocrine TNF- $\alpha$  dependent pathway. HT-29 cells were pretreated with PBS or 5  $\mu$ g/ml TNF- $\alpha$  neutralizing antibody for 2 h, then treated with gemcitabine (300 nM), SN38 (100 nM), etoposide (10  $\mu$ M), or cisplatin (10  $\mu$ M) with or without 100 nM JP1400 for 48 h. Cell viability was determined by measuring ATP levels. Data are presented as average + range of duplicates. Experiments were repeated three times with similar results.

Supplementary Figure 5. Gemcitabine/JP1400 combination effect on TNF- $\alpha$  and cIAP protein levels. A2058 cells treated with 100 nM JP1400, 200 nM gemcitabine or the combination in the presence of 20  $\mu$ M z-VAD for 24 h. (A) Conditioned cell culture medium were collected and analyzed for TNF- $\alpha$  secretion by TNF- $\alpha$  ELISA. Data are

presented as mean + standard deviation of triplicates. (B) Cell lysates were collected and probed for cIAP1, cIAP2 and Actin protein levels by western-blot analysis. Experiments were repeated at least 2 times with similar results.

Supplementary Figure 6. JP1400 alone or JP1400/gemcitabine combination effect in Miapaca-2 cells *in vitro*. Miapaca-2 cells were plated in 96 well plates for 16-24 h prior to the indicated treatment. Cell viability was determined after 72 h by measuring intracellular ATP levels. Data are presented as mean  $\pm$  standard deviation of triplicates. Experiments were repeated at least 3 times with similar results.

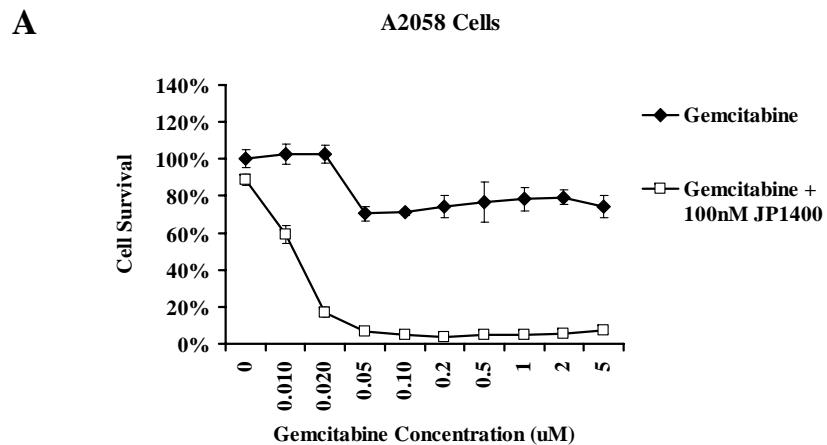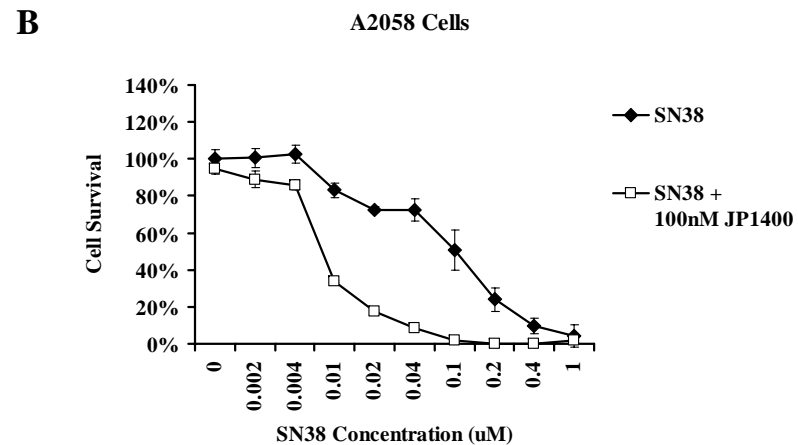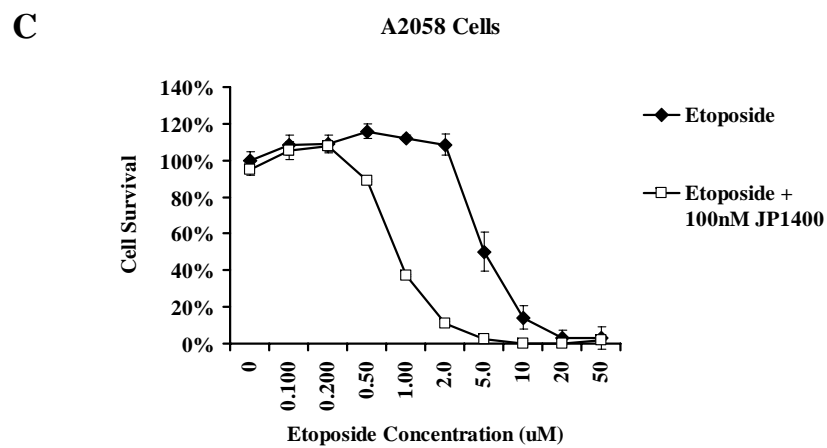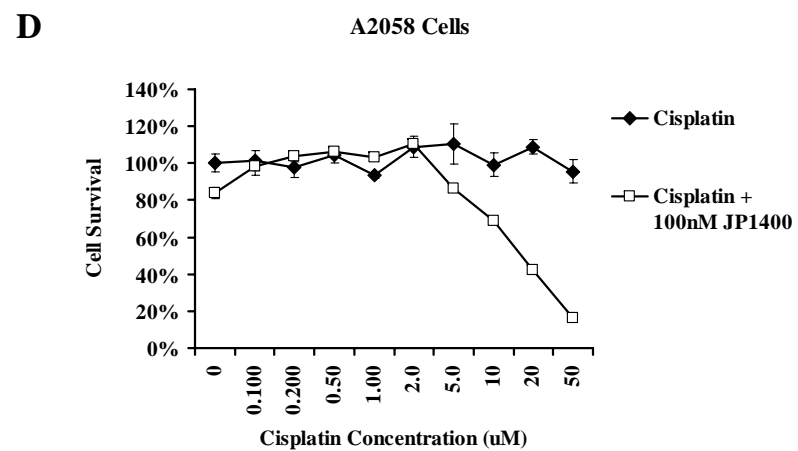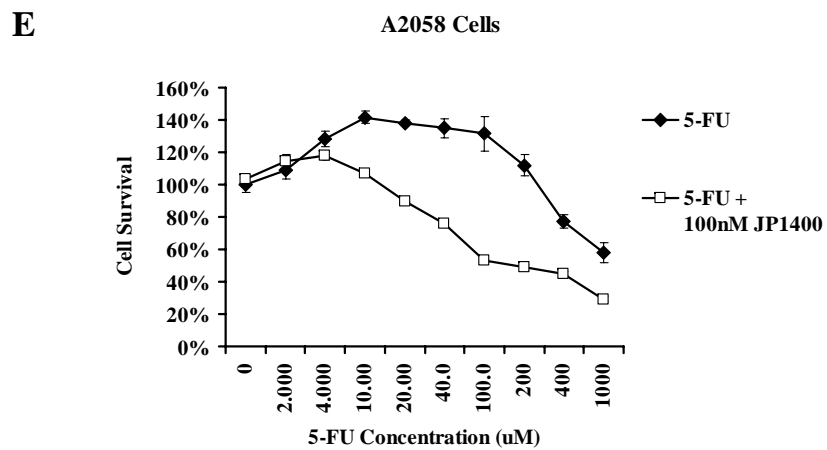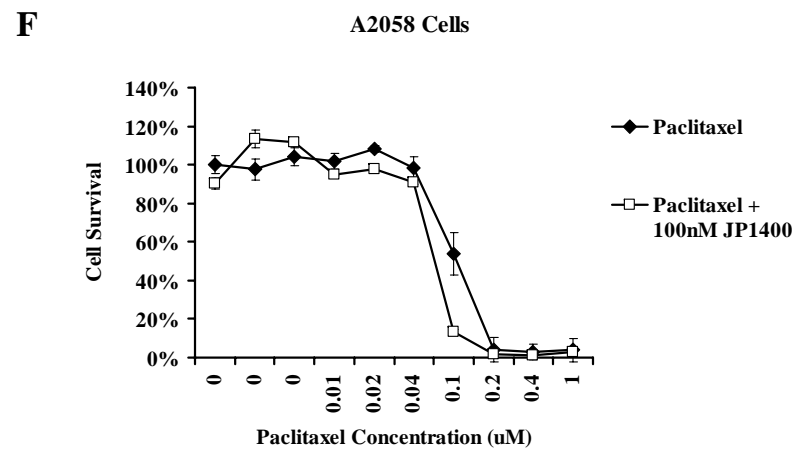

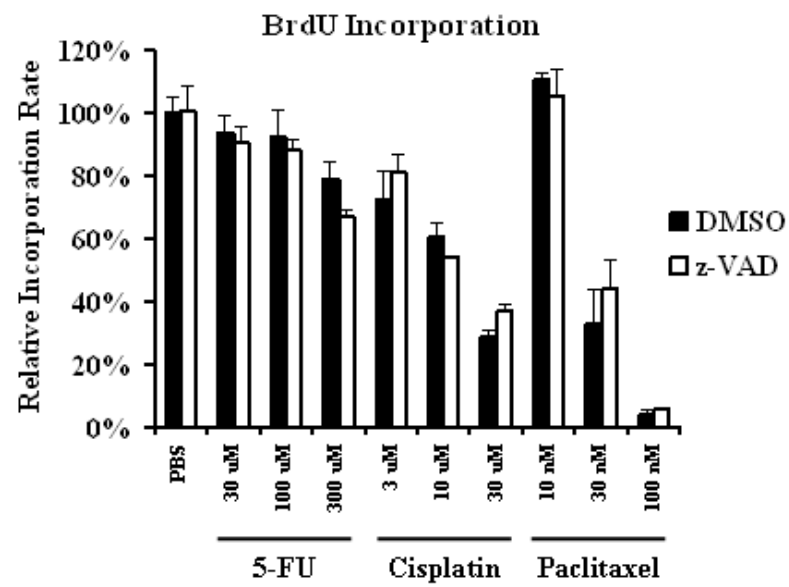

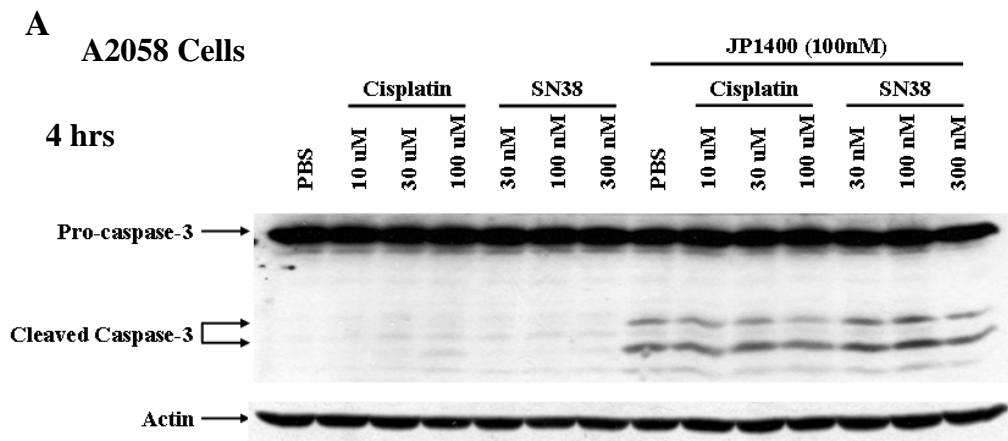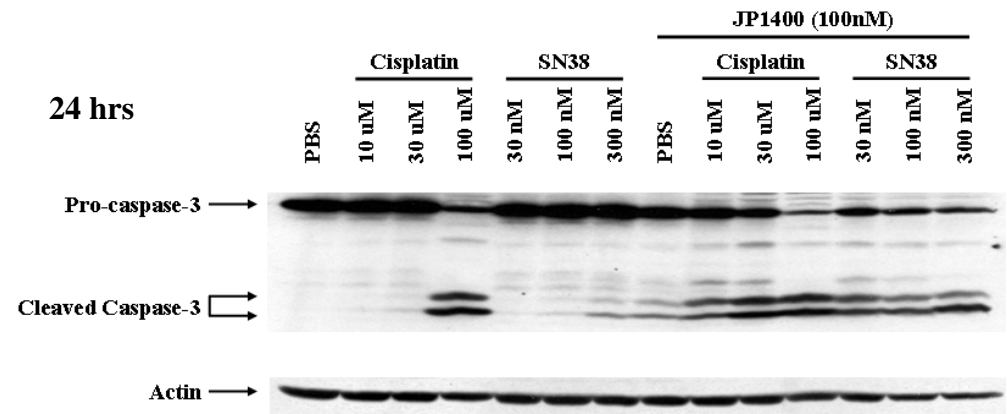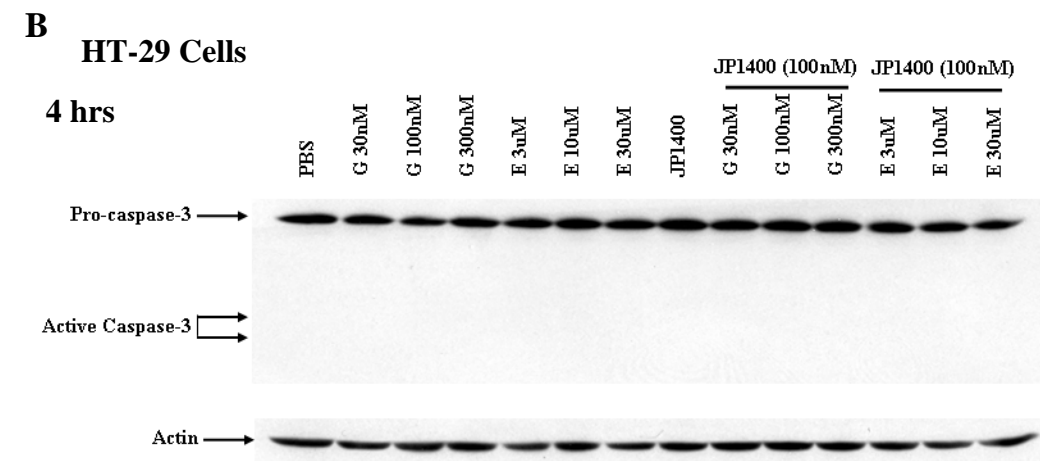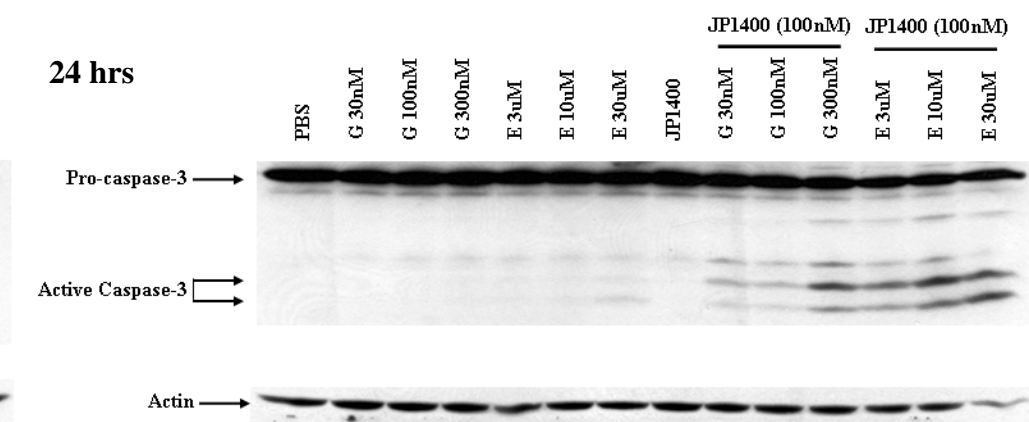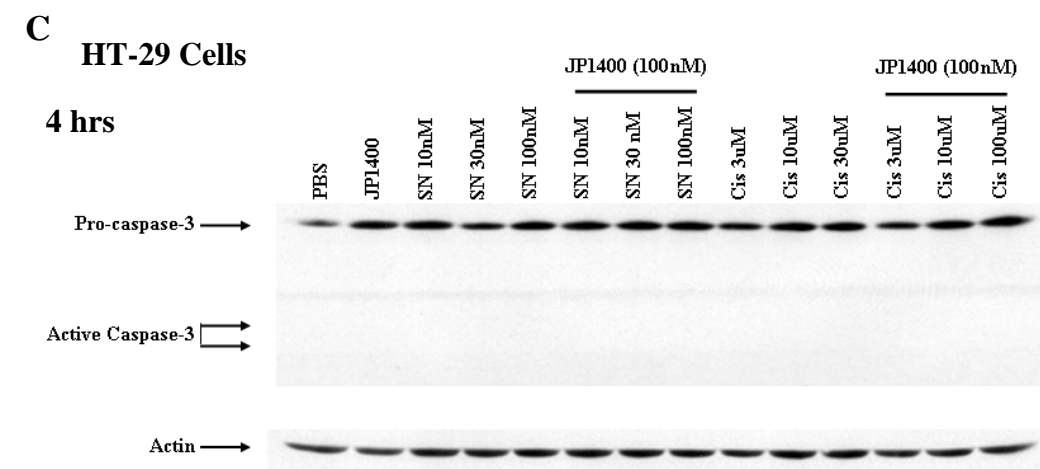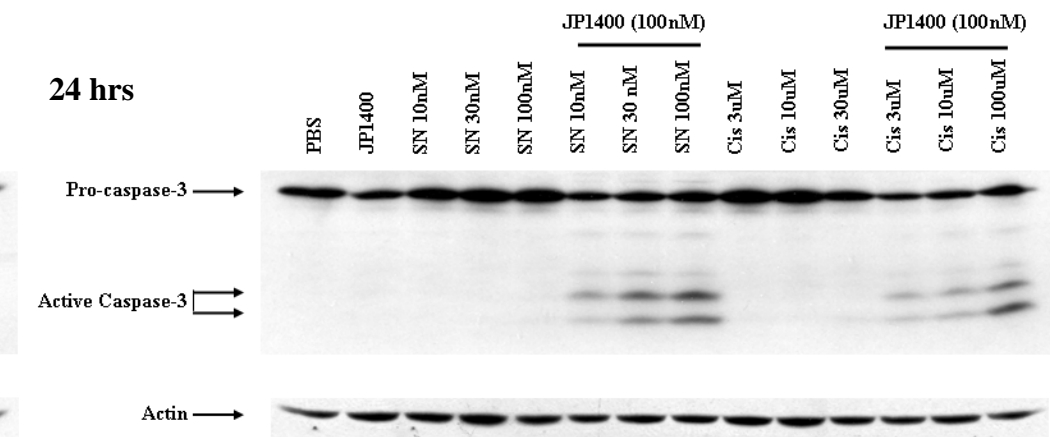

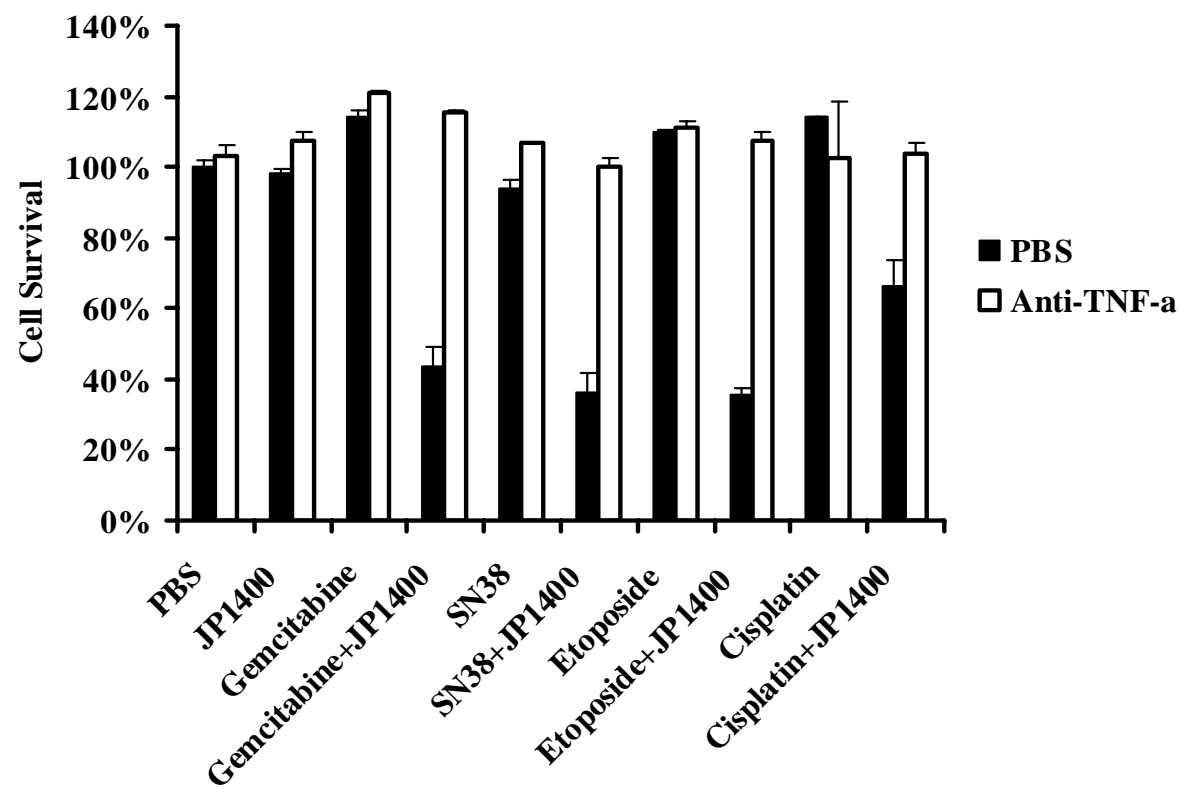

**A**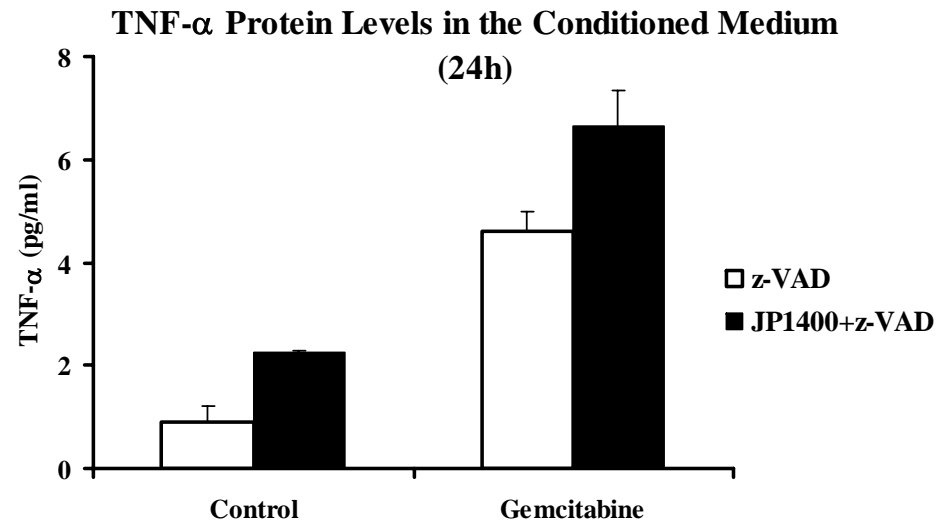**B**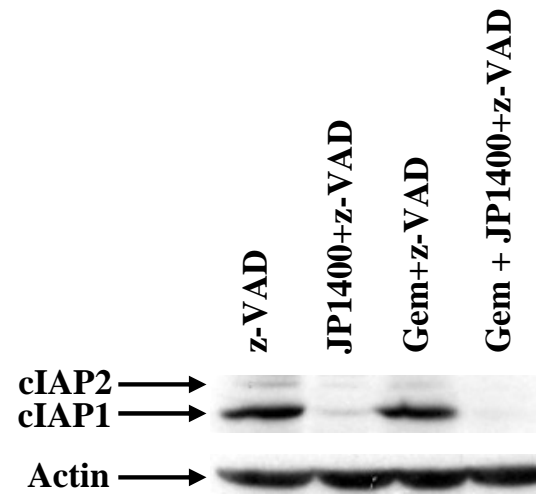

**A**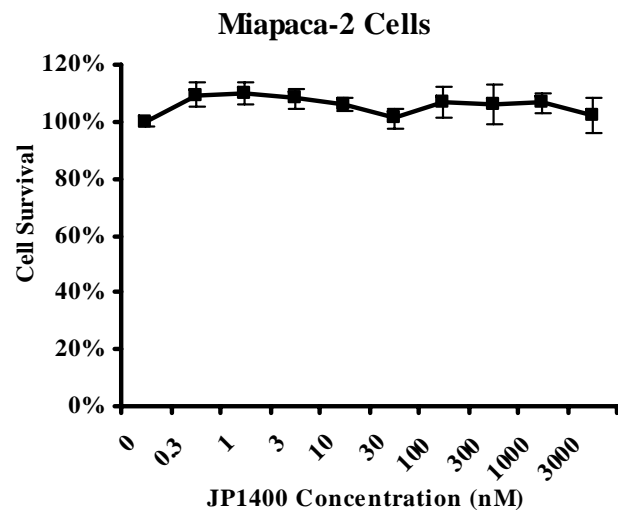**B**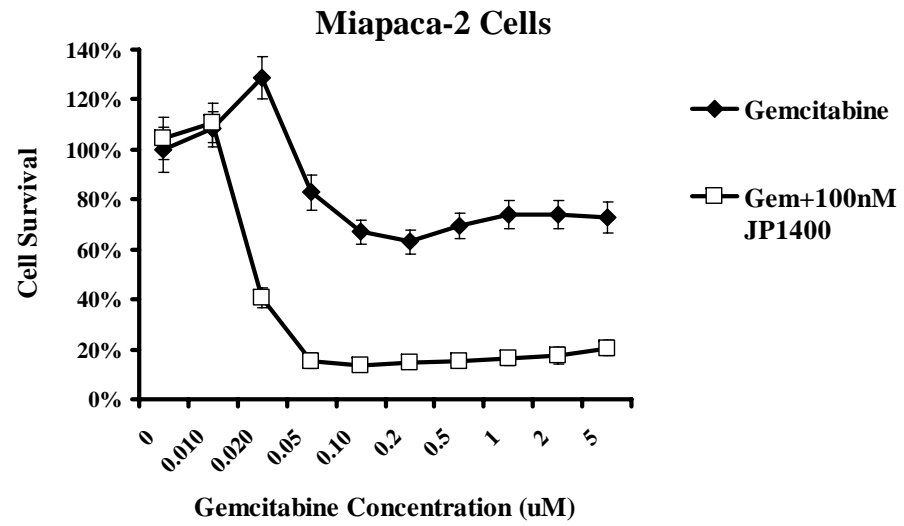

Supplement: NIHMS295301-supplement-SupplFigureLegends.pdf [file NIHMS295301-supplement-SupplFigureLegends.pdf]
